# Supplementary material
Source: PubMed Central journal article supplement (PMC9665180)
Supplement: NIHMS1843273-supplement-suppl_info.pdf [file NIHMS1843273-supplement-suppl_info.pdf]

## SUPPLEMENTAL INFORMATION: ENERGY BUDGET OF DROSOPHILA EMBRYOGENESIS

Yonghyun Song<sup>a,b,c</sup>, Junyoung O. Park<sup>d</sup>, Lukas Tanner<sup>b</sup>, Yatsuhisa Nagano<sup>e</sup>,  
Joshua D. Rabinowitz<sup>a,b,f</sup>, and Stanislav Y. Shvartsman<sup>a,b,g,1</sup>

### Affiliations

<sup>a</sup>Department of Quantitative and Computational Biology, Princeton University, Princeton, NJ 08544, United States

<sup>b</sup>The Lewis-Sigler Institute for Integrative Genomics, Princeton University, Princeton, NJ 08544, United States

<sup>c</sup>Computational Sciences Department, Korea Institute for Advanced Study, Seoul 02455, Republic of Korea

<sup>d</sup>Department of Chemical and Biomolecular Engineering, UCLA, Los Angeles, CA 90095, United States

<sup>e</sup>Research Center for Structural Thermodynamics, Osaka university, Toyonaka, Osaka 560-0043, Japan

<sup>f</sup>Department of Chemistry, Princeton University, Princeton, NJ 08544, United States

<sup>g</sup>Department of Chemical and Biological Engineering, Princeton University, Princeton, NJ 08544, United States

<sup>1</sup>To whom correspondence may be addressed. Email: [stas@princeton.edu](mailto:stas@princeton.edu).

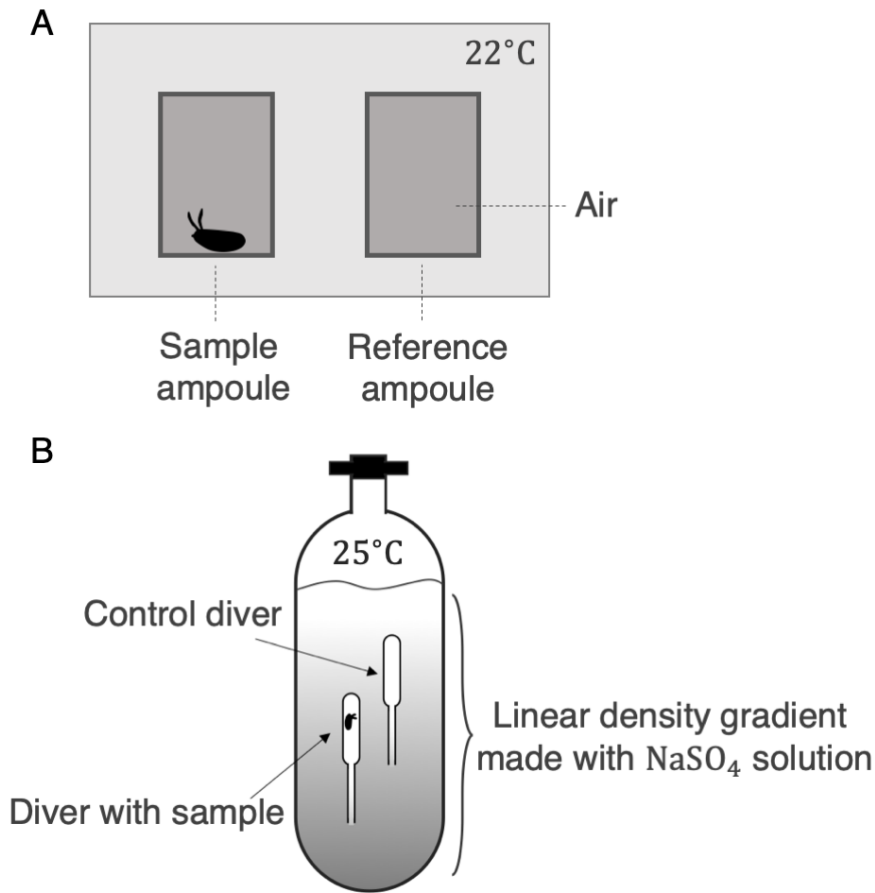

**Figure S1. Calorimetry and respirometry setup.** Related to Figure 1. A: Schematic of the isothermal calorimetry setup as previously reported in [S1]. The ampoules are kept under isothermal condition at 22 °C. The heat dissipation from the control and sample containing ampoule are read out through thermopiles. B: Schematic of the respirometry setup used in [S2]. A linear density gradient of NaSO<sub>4</sub> solution is setup in a pressure controlled column. As the embryo consumes oxygen within the diver, the diver moves down the density gradient. The oxygen consumption rate is calculated from the relative position of the embryo containing diver from that of the control diver.

## **SUPPLEMENTAL EXPERIMENTAL PROCEDURES**

### Fly stocks and husbandry

For the fuel depletion measurements, we used the *Drosophila* stock OregonR provided by the Bloomington Stock Center. Adult flies were matured in room temperature on fresh yeast paste for at least two and at most 14 days to collect embryos. We did not determine the sex of embryos used for this study. All embryos were grown on apple juice plates at 25 °C. All fly stocks were maintained by standard methods at room temperature, and were grown on a standard cornmeal, sucrose, and yeast media. For calorimetry experiments, Canton-S flies were used, and the adults were reared in 25 °C with a standard cornmeal, sucrose, and yeast media.

### Isothermal calorimetry

Heat dissipation throughout embryogenesis was measured through isothermal calorimetry at Osaka University using the same setup that was previously used to measure frog embryo heat dissipation. Freshly laid embryos were first washed with deionized water to remove yeast. Then, a small number of embryos (n=4-5) were loaded onto a wet filter paper and enclosed in a humidified closed volume ampoule filled with air gas, which was kept under isothermal condition at 22 °C. Heat dissipation rate was reported every 10 seconds and the recorded values were two minute averages (Figure S1) [S1].

### Glycogen and triglyceride quantification

Embryos were collected at one hour intervals on apple juice plates with small amounts of yeast paste at room temperature. Pools of ~20 embryos were dechorionated in bleach, washed thoroughly with water, and transferred to sterile microcentrifuge tubes.

For glycogen quantification, glycogen was extracted as described by Parrou and Francoise, 1997 [S3] with minor modifications. Embryos in microcentrifuge tubes were suspended in 50 µM of 0.25 M Na<sub>2</sub>CO<sub>3</sub> and boiled at 95-98 C° for four hours. Then, 30 µL of 1 M acetic acid and 120 µL of 0.2 M sodium acetate was added to this solution. This solution was incubated overnight at 57 C° with 1.0 U/mL of amyloglucosidase (Sigma A7420). The next day, we used Glucose Quantification Assay kit (Sigma GAGO20) to determine the amount of glucose present in the sample. In brief, glucose is oxidized to gluconic acid and hydrogen peroxide by glucose oxidase. Then, hydrogen peroxide reacts with a probe that eventually forms a stable colored product. The intensity of the resulting signal is measured through a colorimeter.

For triglyceride quantification, we used the Triglyceride Assay kit (Abcam ab65336) where we used the protocol specified in the kit for tissue samples. In brief, triglycerides are converted to free fatty acids and glycerol, and the glycerol is oxidized into a product. This product reacts with a probe and generates fluorescence that is measured through a microplate reader.

## **ACKNOWLEDGEMENTS**

We thank the members of the J.D.R. and S.Y.S. laboratories for comments and suggestions throughout this work. We thank Dr. Jasmin Imran Alsous for helpful comments in writing the manuscript. We also thank Drs. Eric F. Wieschaus, Jay B. Benziger, and Pablo G. Debenedetti for helpful discussions. This work was supported by R01GM107103 from NIGMS.

#### **AUTHOR CONTRIBUTIONS**

Conceptualization, Y.S., J.O.P., L.T., Y.N., J.D.R. and S.Y.S.; Investigation, Y.S., J.O.P., L.T., and Y.N.; Writing, Y.S. and S.Y.S. with input from all authors; Funding Acquisition, S.Y.S.

#### **SUPPLEMENTAL REFERENCES**

- S1. Nagano, Y., and Ode, K.L. (2014). Temperature-independent energy expenditure in early development of the African clawed frog *Xenopus laevis*. *Phys. Biol.* *11*, 046008.
- S2. Lints, C.V., Lints, F.A., and Zeuthen, E. (1967). Oxygen consumption during development of the egg in genotypes of *Drosophila melanogaster* with contributions to the gradient diver technique. *Biol. Inst. Carlsb. Found.* *36*, 35–66.
- S3. Parrou, J.L., and François, J. (1997). A simplified procedure for a rapid and reliable assay of both glycogen and trehalose in whole yeast cells. *Anal. Biochem.* *248*, 186–188.
